# Supplementary material for: Simultaneous adsorption of phosphate and diclofenac by Li/Al layered double hydroxides loaded on modified wheat straw
Source: Royal Society of Chemistry journal article supplement (doi:10.1039/d1ew00578b), 2021-01-01
Supplement: d1ew00578b1.pdf [file d1ew00578b1.pdf]

## **Supplementary material**

### **Simultaneous adsorption of phosphate and diclofenac by Li/Al layered double hydroxides loaded on modified wheat straw**

Yunhai Zhang, Hao Wang, Ying Li, Yuexiao Shi, Shunlong Pan, Guangze Nie\*, Yongjun Zhang\*

School of Environmental Science and Engineering, Nanjing Tech University, Nanjing 211816,  
P.R. China

\* To whom correspondence should be addressed

E-mail address: gznie@njtech.edu.cn (G. Nie); y.zhang@njtech.edu.cn (Y. Zhang)

Fax: +86 25 58139960; Tel: +86 25 58139960

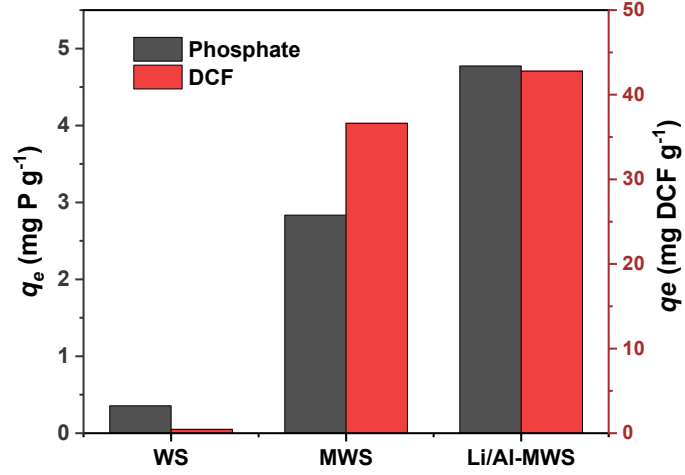

Fig. S1 Adsorption capacities of phosphate and DCF on WS, MWS and Li/Al-MWS.

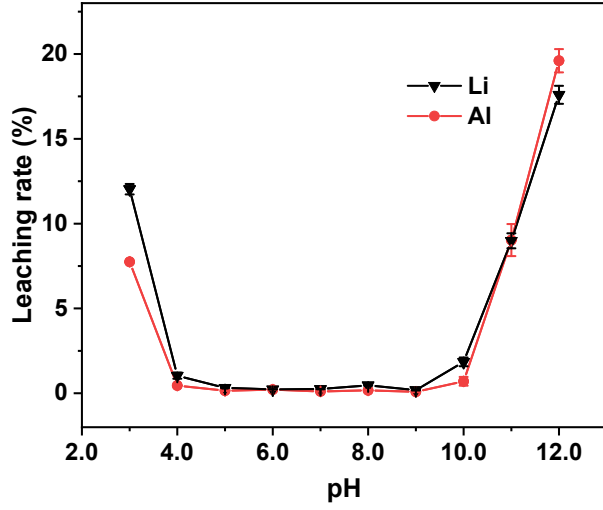

Fig. S2 Stability of Li/Al-MWS under different pH.

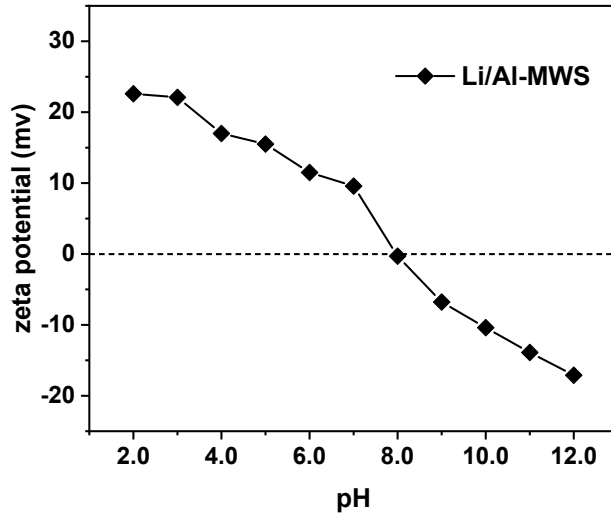

Fig.S3 Zeta potential of Li/Al-MWS.

**Table S1** Kinetic parameters of phosphate adsorption onto Li/Al-MWS.

| Substrate | Pseudo-first-order |       |       | Pseudo-second-order |                   |       | Intraparticle diffusion |        |       |          |       |       |
|-----------|--------------------|-------|-------|---------------------|-------------------|-------|-------------------------|--------|-------|----------|-------|-------|
|           | $q_e$ (mg/g)       | $k_1$ | $R^2$ | $q_e$ (mg/g)        | $k_2 \times 10^3$ | $R^2$ | 1                       |        |       | 2        |       |       |
|           |                    |       |       |                     |                   |       | $k_{p1}$                | $C_1$  | $R^2$ | $k_{p2}$ | $C_2$ | $R^2$ |
| P         | 4.479              | 0.020 | 0.947 | 5.132               | 4.89              | 0.983 | 0.353                   | 0.245  | 0.993 | 0.175    | 1.669 | 0.990 |
| P + DCF   | 3.488              | 0.028 | 0.986 | 3.887               | 9.49              | 0.998 | 0.386                   | -0.151 | 0.996 | 0.102    | 2.010 | 0.996 |

**Table S2** Kinetic parameters of DCF adsorption onto Li/Al-MWS.

| Substrate | Pseudo-first-order |       |       | Pseudo-second-order |                   |       | Intraparticle diffusion |        |       |          |        |       |
|-----------|--------------------|-------|-------|---------------------|-------------------|-------|-------------------------|--------|-------|----------|--------|-------|
|           | $q_e$ (mg/g)       | $k_1$ | $R^2$ | $q_e$ (mg/g)        | $k_2 \times 10^3$ | $R^2$ | 1                       |        |       | 2        |        |       |
|           |                    |       |       |                     |                   |       | $k_{p1}$                | $C_1$  | $R^2$ | $k_{p2}$ | $C_2$  | $R^2$ |
| DCF       | 42.199             | 0.011 | 0.992 | 51.422              | 0.218             | 0.998 | 2.874                   | -2.578 | 0.997 | 1.366    | 16.022 | 0.991 |
| DCF + P   | 28.166             | 0.014 | 0.982 | 33.115              | 0.481             | 0.997 | 2.365                   | -2.202 | 0.988 | 1.161    | 7.977  | 0.983 |

**Table S3** The isothermal fitting parameters of phosphate adsorption onto Li/Al-MWS.

| T/K | Freundlich                    |      |       | Langmuir         |            |       |
|-----|-------------------------------|------|-------|------------------|------------|-------|
|     | $K$ (mg/g)/(g/L) <sup>n</sup> | $n$  | $R^2$ | $q_{max}$ (mg/g) | $b$ (L/mg) | $R^2$ |
| 298 | 7.10                          | 1.65 | 0.984 | 65.58            | 0.091      | 0.984 |
| 308 | 8.09                          | 1.62 | 0.991 | 70.47            | 0.086      | 0.984 |
| 318 | 7.50                          | 1.63 | 0.990 | 74.22            | 0.089      | 0.981 |

**Table S4** The isothermal fitting parameters of DCF adsorption onto Li/Al-MWS.

| T/K | Freundlich                    |      |       | Langmuir         |            |       |
|-----|-------------------------------|------|-------|------------------|------------|-------|
|     | $K$ (mg/g)/(g/L) <sup>n</sup> | $n$  | $R^2$ | $q_{max}$ (mg/g) | $b$ (L/mg) | $R^2$ |
| 298 | 13.44                         | 1.77 | 0.906 | 105.14           | 0.056      | 0.958 |
| 308 | 27.42                         | 2.65 | 0.966 | 113.09           | 0.173      | 0.989 |
| 318 | 37.36                         | 3.20 | 0.910 | 114.35           | 0.291      | 0.983 |
